# Supplementary material
Source: HighWire-hosted journal article supplement (https://bibliotheek.ehb.be/content/92/1/16)
Supplement: inline-supplementary-material-2 [file inline-supplementary-material-2.pdf]

Table S2. Association between depression and current cognitive performance

| Dependent variables                                                                   | Depressive symptomatology           |                               | P- value | Depressive symptomatology           |                               | P- value |
|---------------------------------------------------------------------------------------|-------------------------------------|-------------------------------|----------|-------------------------------------|-------------------------------|----------|
|                                                                                       | CES-D<16 and<br>not treated (n=285) | CES-D≥16 or<br>treated (n=93) |          | CES-D<16 and not<br>treated (n=284) | CES-D≥16 or<br>treated (n=93) |          |
|                                                                                       | Mean(SEM) <sup>a</sup>              | Mean (SEM) <sup>a</sup>       |          | Mean(SEM) <sup>b</sup>              | Mean (SEM) <sup>b</sup>       |          |
| Working memory: time difference between<br>double task and simple task (milliseconds) | -129.6 (180.4)                      | 242.0 (315.9)                 | 0.31     | -121.3 (206.7)                      | 214.4 (327.0)                 | 0.36     |
| Form matching: mean time for correct<br>responses (milliseconds)                      | 5713.0 (89.5)                       | 5851.3 (156.6)                | 0.44     | 5685.1 (102.5)                      | 5828.5 (162.1)                | 0.43     |
| Phoneme comprehension: mean time for<br>correct responses (milliseconds)              | 1498.8 (17.7)                       | 1488.5 (31.0)                 | 0.75     | 1511.1 (20.0)                       | 1500.7 (31.7)                 | 0.77     |
| Name-face associations: number of names<br>correctly recalled                         | 5.5 (0.13)                          | 4.9 (0.22)                    | 0.03     | 5.1 (0.13)                          | 4.6 (0.21)                    | 0.03     |
| Verbal fluency: number of correct answers                                             | 28.8 (0.38)                         | 27.8 (0.66)                   | 0.18     | 28.0 (0.42)                         | 27.2 (0.67)                   | 0.26     |
| Narrative recall: number of correct answers                                           | 13.3 (0.26)                         | 12.8 (0.45)                   | 0.31     | 12.9 (0.29)                         | 12.5 (0.46)                   | 0.46     |
| Descriptive recall: number of correct answers                                         | 13.1 (0.26)                         | 12.3 (0.45)                   | 0.14     | 12.5 (0.28)                         | 11.9 (0.44)                   | 0.22     |

|                                                          |             |             |      |             |             |      |
|----------------------------------------------------------|-------------|-------------|------|-------------|-------------|------|
| Implicit Memory: difference between learnt and new items | 1.02 (0.04) | 0.99 (0.08) | 0.72 | 1.07 (0.05) | 1.02 (0.08) | 0.58 |
|----------------------------------------------------------|-------------|-------------|------|-------------|-------------|------|

<sup>a</sup> Non adjusted.

<sup>b</sup> Adjusted for education level, gender and age.

Table S3. Association between depression and current categorical cognitive performances

|                                             | Depressive symptomatology        |                            | P- value <sup>a</sup> | P- value <sup>b</sup> |
|---------------------------------------------|----------------------------------|----------------------------|-----------------------|-----------------------|
|                                             | CES-D<16 and not treated (n=285) | CES-D≥16 or treated (n=93) |                       |                       |
|                                             | n (%)                            | n (%)                      |                       |                       |
| Form matching, <7 correct responses         | 144 (50.5)                       | 54 (58.1)                  | 0.21                  | 0.19                  |
| Phoneme comprehension, <9 correct responses | 85 (29.8)                        | 35 (37.6)                  | 0.16                  | 0.18                  |

<sup>a</sup> Non adjusted, Chi squared test.

<sup>b</sup> Adjusted for education level, gender and age, logistic regression.

Table S4. Associations between hippocampal volume as the dependent variable and cognitive scores (separate linear models), n=193

| Dependent variables                                                                | Hippocampal gray matter volume<br>(Adjusted cognitive change for one cm <sup>3</sup> ) |                      |
|------------------------------------------------------------------------------------|----------------------------------------------------------------------------------------|----------------------|
|                                                                                    | $\beta$ (SE) <sup>a</sup>                                                              | p-value <sup>a</sup> |
| Linear model                                                                       |                                                                                        |                      |
| Working memory: time difference between double task and simple task (milliseconds) | 490 (1188)                                                                             | 0.68                 |
| Form matching: mean time for correct responses (milliseconds)                      | -0.80 (536)                                                                            | 0.99                 |
| Phoneme comprehension: mean time for correct responses (milliseconds)              | 40.37 (110)                                                                            | 0.72                 |
| Name-face associations: number of names correctly recalled                         | 0.17 (0.76)                                                                            | 0.82                 |
| Verbal fluency: number of correct answers                                          | -0.26 (2.27)                                                                           | 0.91                 |
| Narrative recall: number of correct answers                                        | 0.40 (1.71)                                                                            | 0.81                 |
| Descriptive recall: number of correct answers                                      | 0.56 (1.47)                                                                            | 0.70                 |
| Implicit Memory: difference between learnt and new items                           | -0.12 (0.32)                                                                           | 0.71                 |
| Logistic regression                                                                | OR (95%IC)                                                                             | p-value <sup>a</sup> |
| Form matching, <7 correct responses                                                | 0.55 (0.13; 2.39)                                                                      | 0.43                 |
| Phoneme comprehension, <9 correct responses                                        | 2.82 (0.60;13.33)                                                                      | 0.19                 |

<sup>a</sup> Adjusted for total intracranial volume, education, gender and age
